# Supplementary material for: An asymmetric hot carrier tunneling van der Waals heterostructure for multibit optoelectronic memory
Source: Royal Society of Chemistry journal article supplement (doi:10.1039/c9mh01923e), 2020-01-01
Supplement: c9mh01923e1.pdf [file c9mh01923e1.pdf]

## Electronic supporting Information

# Asymmetric Hot Carrier Tunneling van der Waals Heterostructure for Multibit Optoelectronic Memory

Yuqian Chen,<sup>‡a</sup> Jun Yu,<sup>‡a</sup> Fuwei Zhuge,<sup>\*a</sup> Yuhui He,<sup>b</sup> Qingfu Zhang,<sup>a</sup> Shiwen Yu,<sup>a</sup> Kailang Liu,<sup>a</sup>

Liang Li,<sup>c</sup> Ying Ma,<sup>a</sup> Tianyou Zhai<sup>\*a</sup>

<sup>a</sup>. State Key Laboratory of Material Processing and Die and Mould Technology, School of Materials Science and Engineering, Huazhong University of Science and Technology, Wuhan 430074, P. R. China

<sup>b</sup>. School of Optoelectronic and Information, Huazhong University of Science and Technology, Wuhan 430074, P. R. China

<sup>c</sup>. Institutes of Physical Science and Information Technology & School of Physics and Materials Science, Anhui University, Hefei 230601, P. R. China

\*Corresponding Authors. E-mail: zhugefw@hust.edu.cn and zhai@hust.edu.cn.

<sup>‡</sup> These authors contributed equally to this work.

## 1. Ambient Stability of PtS<sub>2</sub> and the memory device after months.

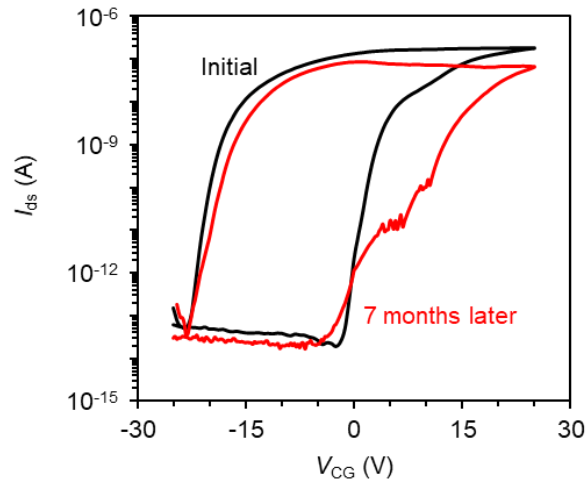

**Fig. S1.** The stability of electrically programmed hysteresis of memory after seven months, implying the excellent stability of PtS<sub>2</sub> in ambient environments.

## 2. Control experiments on thin PtS<sub>2</sub> flake

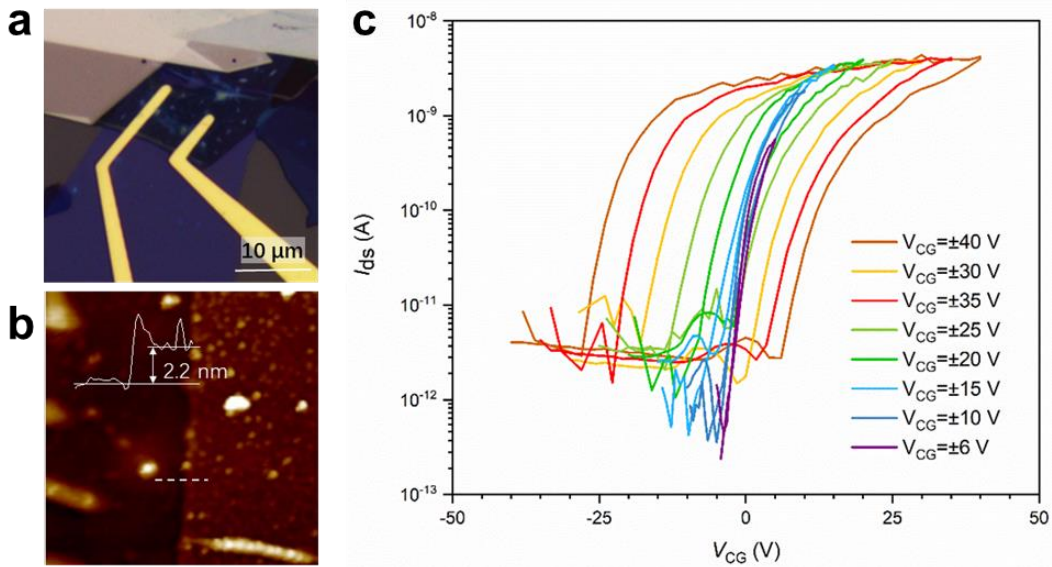

**Fig. S2.** Transfer curves of the float gate heterostructure using thin PtS<sub>2</sub> flake (2.2 nm) as the semiconductor channel, in which a ON/OFF ratio of  $10^3$  is obtained.

### 3. IV characteristic of the initial memory and at ON and OFF states.

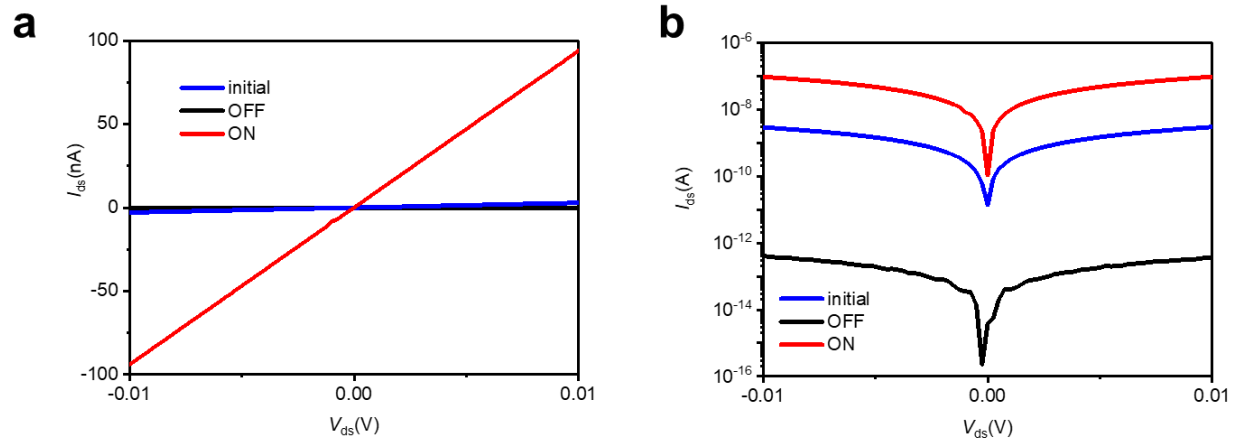

**Fig. S3.** IV characteristic of the initial memory and under ON and OFF states. The ohmic contact to  $\text{PtS}_2$  is vital for the obtained large ON/OFF ratio in memory without Schottky contact limited ON states.

#### 4. Extraction of threshold voltage for ON and OFF states of the memory.

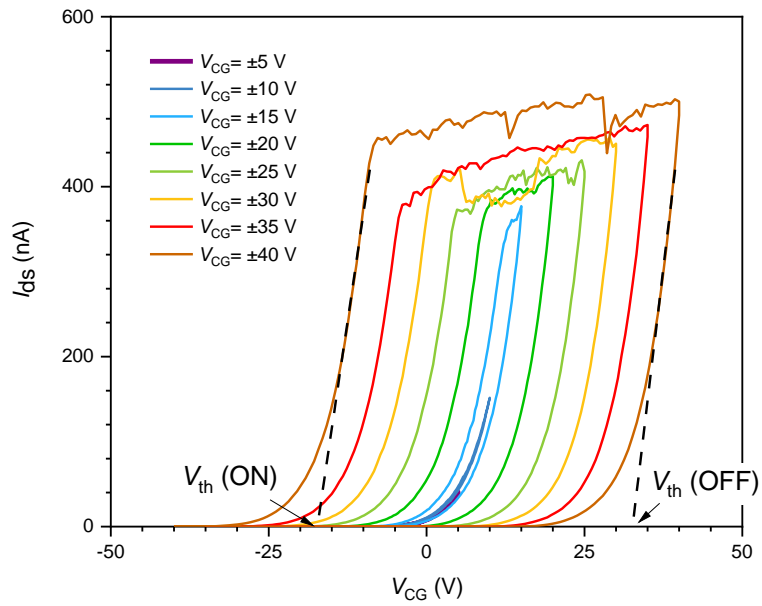

**Fig. S4** The transfer curves of the float gate memory when sweeping  $V_{CG}$  in different ranges from  $\pm 5$  to  $\pm 40$  V. The threshold voltage ( $V_{th}$ ) at ON and OFF states are extracted from the linear extrapolation of respectively the left and right side of the loop.

## 5. Retention and pulsed program/erase characteristic of the memory.

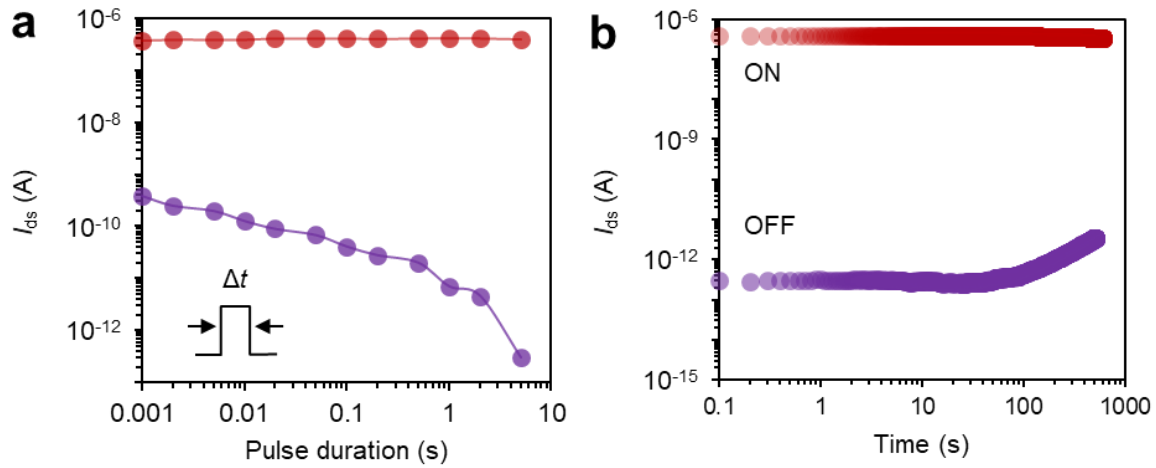

**Fig. S5.** a) Effect of the width of electric pulse (30 V) on the read current at ON and OFF states. b) The measured retention characteristic of memory. When reducing the duration of electric pulse, the trapped charges in float gate is reduced depends on the magnitude of tunneling current and the capacitance of float gate. As a result, short electric pulse tends to lead to lower ON/OFF ratio. It is also observed that the erase process shows more dependence on the electric pulse duration compared to the program. This is attributed to the higher charge tunneling barrier during erase than the program discussed in the manuscript.

6. Optical image of a device with and without graphene float gate.

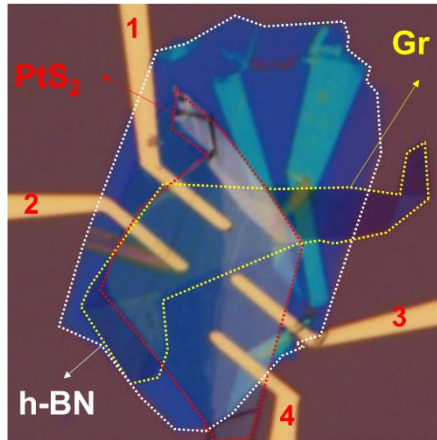

**Fig. S6.** Optical image of a control device having both PtS<sub>2</sub>/h-BN/Gr and PtS<sub>2</sub>/h-BN structure, from what the role of graphene float gate on memory performance is studied.

7. Transfer curves and retention characteristic of the device with and without graphene float gate.

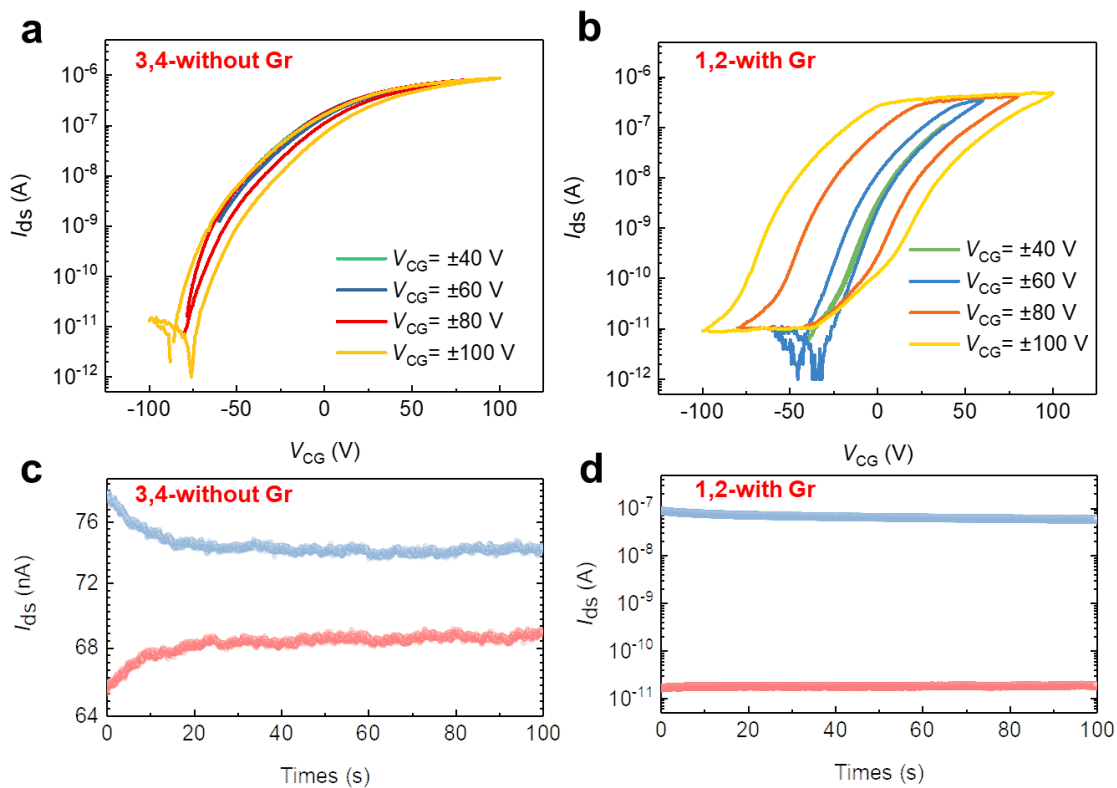

**Fig. S7.** Transfer curves and retention characteristic of the devices with or without graphene float gate: (a), (c) without float gate; (b), (d) with float gate.

**8. 2D map of programmed/erased ON/OFF states via synchronized electric and light pulses.**

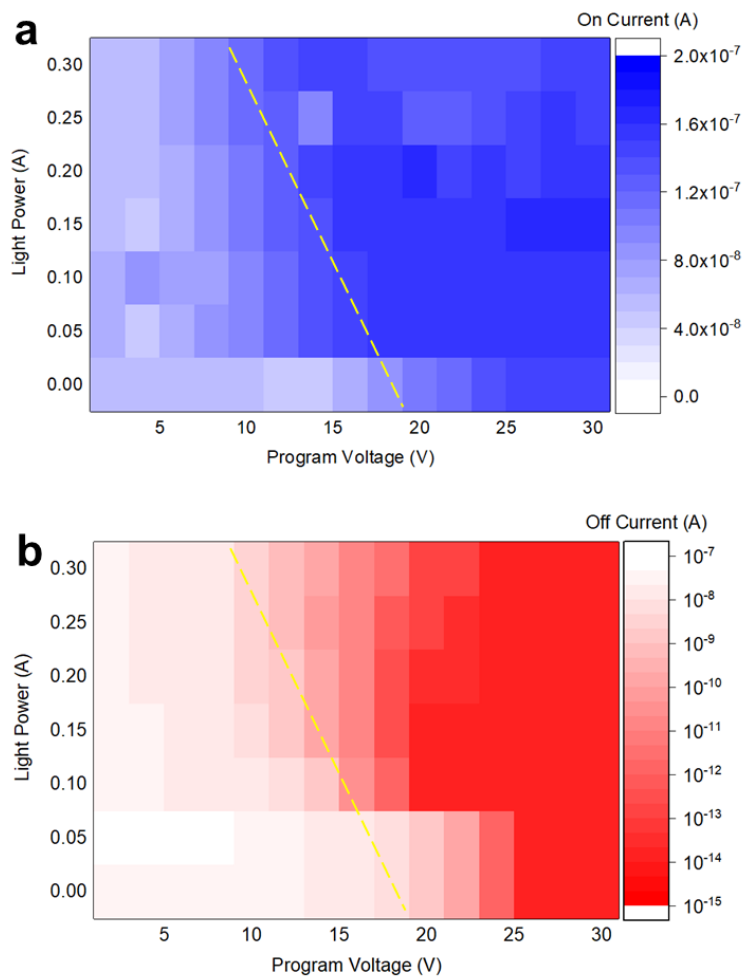

**Fig. S8.** 2D map of the ON and OFF state conductance programmed/erased by synchronized electric and light pulses.



## 9. Transient conductance change in memory by light exposure

To model the transient conductance change, the charge injection across h-BN by light exposure is modeled by numerically solving the coupled  $E_{ox}$  1-3, using the effective tunneling barriers as the fit parameter.

$$J_t(t) = \frac{A}{\Phi_B} E_{ox}^2(t) \exp\left(-\frac{B\Phi_B^{\frac{3}{2}}}{E_{ox}(t)}\right) \quad (1)$$

$$\frac{dQ_{tr}(t)}{dt} = -J_t(V_{FG}, P_{light}) \quad (2)$$

$$Q_{tr}(t) = V_{FG}(t)C_{FG} \quad (3)$$

where  $A$  and  $B$  are constants,  $\Phi_B$  is the effective barrier height and  $E_{ox}$  is the electric field throughout dielectric layer,  $S$  is the active device area and  $C_{FG}$  is the capacitance between float gate and PtS<sub>2</sub> channel.

To further fit the measurement results, the charge trapping  $Q_{tr}$  in h-BN need to be converted to observable conductance in experiments. This is achieved by firstly transform  $Q_{tr}$  into an equivalent  $V_{CG}$  that causes same potential drop across h-BN. The conductance in PtS<sub>2</sub> is then approximated based on the interpolation of a hysteresis corrected transfer ( $I \sim V_{CG}$ ) curve in Fig. 1d. As illustrated in following Fig. S9, the transient conductance change of the memory in ON and OFF states by light exposure could be well described using the asymmetric tunneling barriers of 0.26 eV for hole tunneling from graphene to PtS<sub>2</sub> and 0.1 eV for the reverse tunneling.

## 10. Numerical fitting to the light induced transient conductance change by light exposure.

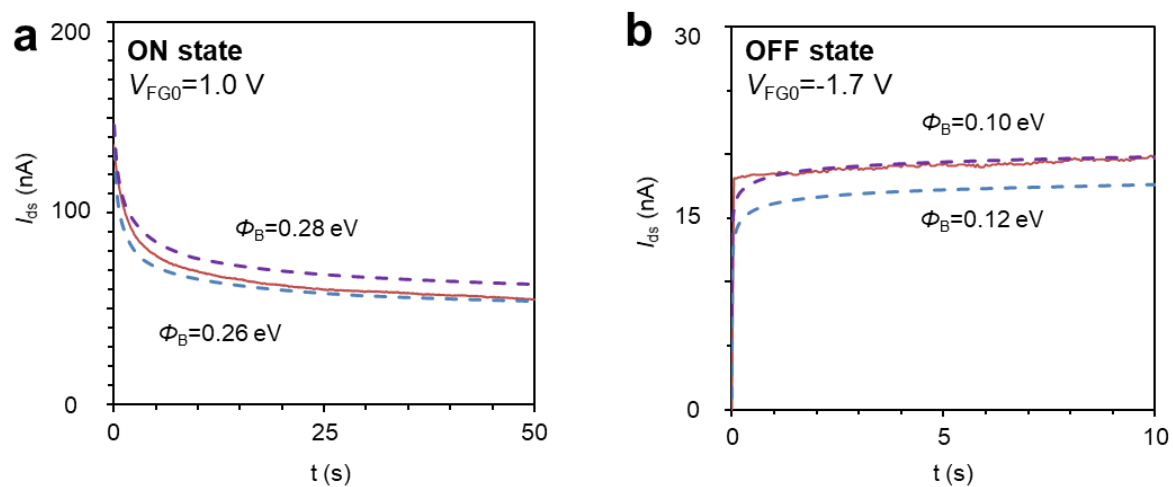

**Fig. S9.** Numerical fitting to the transient change of memory states in a) ON and b) OFF states by light exposure.

## 11. Optical program behavior of a float gate memory of MoS<sub>2</sub>/h-BN/graphene.

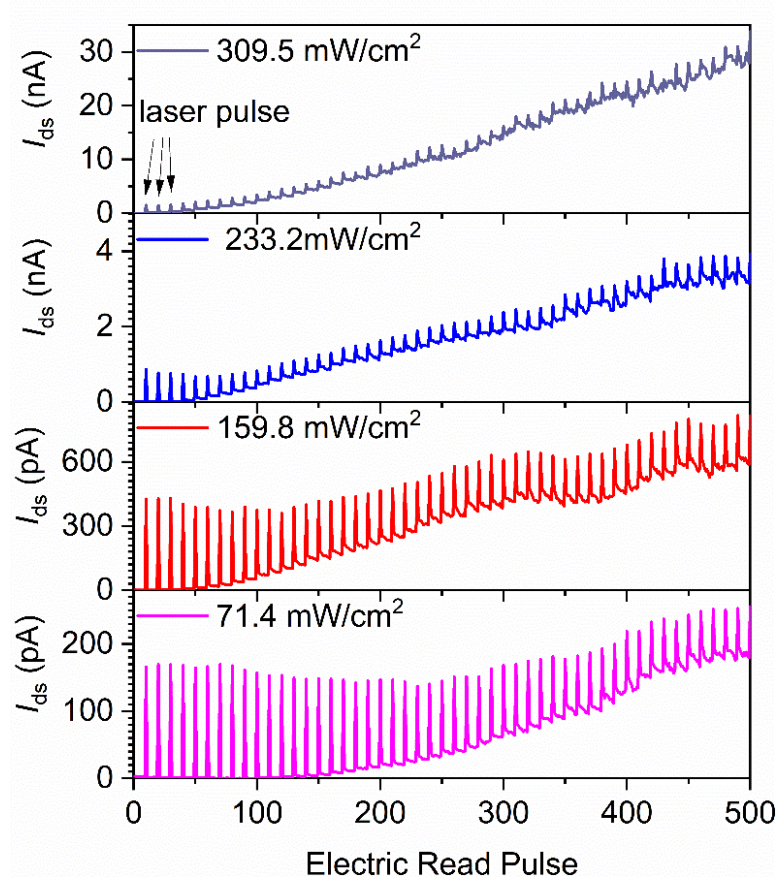

**Fig. S10.** Optical program behavior of a convention device fabricated by MoS<sub>2</sub>/h-BN/graphene.

The memory is first erased by an electric pulse of  $V_{CG}=25$  V and then exposed to light pulses of different light intensity. The thickness of MoS<sub>2</sub> and h-BN is respectively 5.1 and 11.3 nm.

## 12. Effect of light intensity to the optical programmed conductance states in memory.

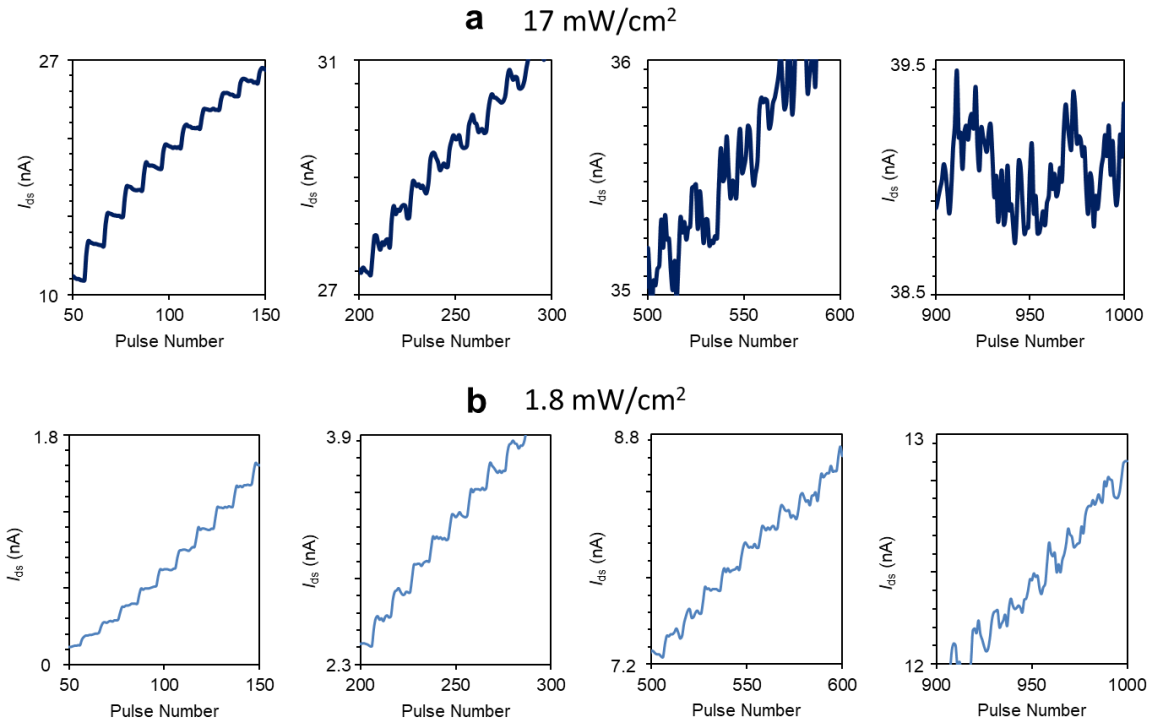

**Fig. S11.** The multibit memory states programmed via 532 nm light pulses at the intensity of 1.8 and 17 mW/cm<sup>2</sup>. Light pulses of low intensity render more distinguishable memory states compared to high intensity pulses by avoiding rapid saturation of conductance states.

### 13. Multi-bit states achieved with a convention device of MoS<sub>2</sub>/h-BN/graphene.

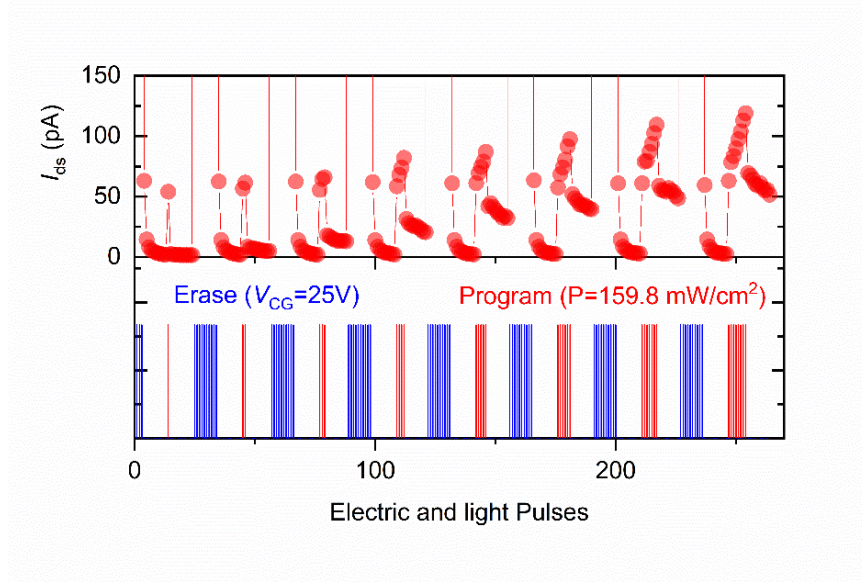

**Fig. S12.** Optical program behavior of a convention device fabricated by MoS<sub>2</sub>/h-BN/graphene.

The memory is first erased by an electric pulse of  $V_{CG}=25 \text{ V}$  and then exposed to light pulses of different pulse number.
